# Supplementary material for: Is the OJIP Test a Reliable Indicator of Winter Hardiness and Freezing Tolerance of Common Wheat and Triticale under Variable Winter Environments?
Source: PLoS One. 2015 Jul 31;10(7):e0134820. doi: 10.1371/journal.pone.0134820 (PMC4521754; doi:10.1371/journal.pone.0134820)
Supplement: S1 Text — (DOCX) [file pone.0134820.s005.docx]

ABS / RC = M0 · (1 / VJ) · (Fm / Fv)

TRo / RC = M0 · (1 / VJ)

ETo / RC = M0 · (1 / VJ) · ψo

DIo / RC = (ABS / RC) – (TRo / RC)

ABS / CS = F0

TRo / CS = Fv/Fm (ABS / CSo )

ETo / CS = Fv/Fm · ψ0 · (ABS / CSo)

DIo / CS = (ABS / CS) – (TRo/ CS)

RC / CSo = Fv/Fm · ( VJ / M0 ) · F0

RC / CSm = Fv/Fm · ( VJ / M0 ) · Fm

PIABS = [1/(RC/ABS)] · [Fv/Fm/(1-Fv/Fm)] · [ψ0/(1–ψ0)]

PICSo = F0 · PIABS

PICSm = Fm · PIABS

where:

VJ = (FJ – F0) / (Fm – F0)

M0 = 4·(F300 – F0) / (Fm – F0)

Fv = Fm – F0

F0, F300, FJ: chlorophyll fluorescence intensity after 10 μs, 300 μs and 2 ms of the recording. Fm – maximum fluorescence signal intensity
